# Supplementary material
Source: PubMed Central journal article supplement (PMC7428071)
Supplement: supp_8.3.E487_2019-0229-2-at.pdf [file supp_8.3.E487_2019-0229-2-at.pdf]

## Appendix 2 (as supplied by the authors)

### Sources of data on cannabis consumption in Canada

| Year | Survey | Sampling Method                                                                                           | Questions Used                                                                                                 | Response Rate* (%) | Missing Data (%) |
|------|--------|-----------------------------------------------------------------------------------------------------------|----------------------------------------------------------------------------------------------------------------|--------------------|------------------|
| 2004 | CTUMS  | Cross-sectional; two-phase stratified random sample; computer-assisted random-dialed telephone interviews | “Have you used it (i.e. marijuana) in the past 12 months?”                                                     | 87.6               | 2.5              |
| 2005 | CTUMS  | Cross-sectional; two-phase stratified random sample; computer-assisted random-dialed telephone interviews | “Have you used it (i.e. marijuana) in the past 12 months?”                                                     | 84.1               | 2.2              |
| 2006 | CTUMS  | Cross-sectional; two-phase stratified random sample; computer-assisted random-dialed telephone interviews | “Have you used it (i.e. marijuana) in the past 12 months?”                                                     | 86.5               | 2.1              |
| 2007 | CTUMS  | Cross-sectional; two-phase stratified random sample; computer-assisted random-dialed telephone interviews | “Have you used it (i.e. marijuana) in the past 12 months?”                                                     | 86.5               | 2.1              |
| 2008 | CTUMS  | Cross-sectional; two-phase stratified random sample; computer-assisted random-dialed telephone interviews | “Have you used it (i.e. marijuana) in the past 12 months?”                                                     | 86.3               | 2.1              |
| 2008 | CADUMS | Two-phase stratified random sample; computer-assisted random-dialed telephone interviews                  | “Have you used it (i.e. marijuana) in the past 12 months?”;<br>“Have you been pregnant in the past 12 months?” | 43.5               | 0.4; 0.06        |
| 2009 | CTUMS  | Cross-sectional; two-phase stratified random sample; computer-assisted random-dialed telephone interviews | “Have you used it (i.e. marijuana) in the past 12 months?”                                                     | 85.1               | 1.9              |
| 2009 | CADUMS | Two-phase stratified random sample; computer-assisted random-dialed telephone interviews                  | “Have you used it (i.e. marijuana) in the past 12 months?”;<br>“Have you been pregnant in the past 12 months?” | 44.7               | 0.4; 0.1         |
| 2010 | CTUMS  | Cross-sectional; two-phase stratified random sample; computer-assisted random-dialed telephone interviews | “Have you used it (i.e. marijuana) in the past 12 months?”                                                     | 84.2               | 1.9              |
| 2010 | CADUMS | Two-phase stratified random sample; computer-assisted random-dialed telephone interviews                  | “Have you used it (i.e. marijuana) in the past 12 months?”;<br>“Have you been pregnant in the past 12 months?” | 42.8               | 0.4; 0.3         |

|      |        |                                                                                                           |                                                                                                          |      |     |
|------|--------|-----------------------------------------------------------------------------------------------------------|----------------------------------------------------------------------------------------------------------|------|-----|
| 2011 | CADUMS | Two-phase stratified random sample; computer-assisted random-dialed telephone interviews                  | “Have you used it (i.e. marijuana) in the past 12 months?” “Have you been pregnant in the past 5 years?” | 42.8 | 0.1 |
| 2011 | CTUMS  | Cross-sectional; two-phase stratified random sample; computer-assisted random-dialed telephone interviews | “Have you used it (i.e. marijuana) in the past 12 months?”                                               | 83.9 | 2   |
| 2012 | CADUMS | Two-phase stratified random sample; computer-assisted random-dialed telephone interviews                  | “Have you used it (i.e. marijuana) in the past 12 months?” “Have you been pregnant in the past 5 years?” | 39.8 | 0.4 |
| 2012 | CTUMS  | Cross-sectional; two-phase stratified random sample; computer-assisted random-dialed telephone interviews | “Have you used it (i.e. marijuana) in the past 12 months?”                                               | 83   | 1.8 |
| 2013 | CTADS  | Cross-sectional; two-phase stratified random sample; computer-assisted random-dialed telephone interviews | “During the past 12 months have you used marijuana?”                                                     | 81.8 | 0.9 |
| 2015 | CTADS  | Cross-sectional; two-phase stratified random sample; computer-assisted random-dialed telephone interviews | “During the past 12 months have you used marijuana?”                                                     | 79   | 1.1 |
| 2017 | CTADS  | Cross-sectional; two-phase stratified random sample; computer-assisted random-dialed telephone interviews | “During the past 12 months have you used marijuana?”                                                     | 70.4 | 1.4 |

Notes: All surveys covered all Canadian provinces but excluded residents of the Canadian Territories and institutionalized populations.

\*Total response rate for the survey

CTUMS: Canadian Tobacco Use Monitoring Survey; CADUMS: Canadian Alcohol and Drug Use Monitoring Survey; CTADS: Canadian Tobacco, Alcohol and Drugs Survey
