# Supplementary material
Source: PubMed Central journal article supplement (PMC7428071)
Supplement: supp_8.3.E487_2019-0229-3-at.pdf [file supp_8.3.E487_2019-0229-3-at.pdf]

### Appendix 3 (as supplied by the authors)

Prevalence and Trends in Past-3 Month Cannabis Use Among Men and Women in Canada, By Respondent Characteristics with Crude and Adjusted Odds Ratios, 2013-2017 Canadian Alcohol and Drugs Survey

|                   | Men                    |                  |                  | Women                  |                   |                    |
|-------------------|------------------------|------------------|------------------|------------------------|-------------------|--------------------|
|                   | Prevalence, % (95% CI) | OR (95% CI)      | aOR (95% CI)     | Prevalence, % (95% CI) | OR (95% CI)       | aOR (95% CI)       |
| Survey year       |                        |                  |                  |                        |                   |                    |
| 2013              | 10.7 (9.2-12.5)        | 1.00             | 1.00             | 5.1 (4.2-6.2)          | 1.00              | 1.00               |
| 2015              | 11.3 (9.9-12.9)        | 1.06 (0.85-1.32) | 1.11 (0.86-1.43) | 6.4 (5.5-7.6)          | 1.28 (0.97-1.69)  | 1.46 (1.09-1.96)   |
| 2017              | 13.8 (11.6-16.4)       | 1.33 (1.03-1.73) | 1.45 (1.09-1.92) | 8.3 (6.7-10.2)         | 1.69 (1.24-2.31)  | 1.93 (1.42-2.61)   |
| Age group (years) |                        |                  |                  |                        |                   |                    |
| 15-19y            | 17.0 (15.2-19.0)       | 2.50 (1.99-3.15) | 4.86 (3.67-6.43) | 11.3 (9.8-13.0)        | 3.13 (2.38-4.12)  | 7.02 (5.05-9.77)   |
| 20-24y            | 25.4 (23.1-27.9)       | 4.17 (3.32-5.23) | 6.21 (4.76-8.10) | 15.9 (14.0-18.0)       | 4.63 (3.54-6.06)  | 8.03 (5.89-10.94)  |
| 25-34y            | 22.5 (18.3-27.3)       | 3.55 (2.58-4.89) | 4.82 (3.40-6.84) | 11.6 (8.7-15.3)        | 3.22 (2.18-4.75)  | 4.41 (3.00-6.48)   |
| 35-44y            | 11.4 (8.9-14.5)        | 1.57 (1.12-2.20) | 1.85 (1.31-2.62) | 7.4 (5.4-10.0)         | 1.95 (1.30-2.92)  | 2.12 (1.43-3.14)   |
| 45-64y            | 7.6 (6.4-9.0)          | 1.00             | 1.00             | 3.9 (3.2-4.9)          | 1.00              | 1.00               |
| 65+y              | 1.8 (1.0-3.2)          | 0.23 (0.12-0.42) | 0.23 (0.12-0.42) | 1.1 (0.6-2.0)          | 0.28 (0.15-0.52)  | 0.31 (0.16-0.58)   |
| Tobacco smoking   |                        |                  |                  |                        |                   |                    |
| Current smoker    | 30.9 (27.4-34.7)       | 5.42 (4.27-6.87) | 7.32 (5.61-9.53) | 23.0 (19.1-27.4)       | 7.78 (5.84-10.36) | 11.13 (8.22-15.06) |
| Former smoker     | 9.9 (8.0-12.1)         | 1.33 (1.00-1.75) | 3.16 (2.28-4.39) | 6.1 (4.9-7.7)          | 1.70 (1.27-2.28)  | 3.91 (2.75-5.56)   |
| Never smoker      | 7.6 (6.6-8.9)          | 1.00             | 1.00             | 3.7 (3.2-4.3)          | 1.00              | 1.00               |
| Province          |                        |                  |                  |                        |                   |                    |
| N.L.              | 9.6 (7.9-11.7)         | 1.00             | 1.00             | 4.9 (3.6-6.5)          | 1.00              | 1.00               |
| P.E.I.            | 11.8 (9.4-14.8)        | 1.26 (0.90-1.77) | 1.32 (0.86-2.01) | 5.1 (3.7-6.9)          | 1.04 (0.67-1.63)  | 1.16 (0.71-1.91)   |
| Nova Scotia       | 14.4 (12.1-17.0)       | 1.57 (1.17-2.11) | 1.50 (1.05-2.16) | 8.7 (7.0-10.8)         | 1.86 (1.26-2.75)  | 2.15 (1.41-3.27)   |
| N.B.              | 10.3 (8.3-12.7)        | 1.07 (0.77-1.48) | 1.11 (0.75-1.64) | 6.0 (4.6-7.7)          | 1.24 (0.82-1.88)  | 1.45 (0.93-2.26)   |
| Quebec            | 9.9 (8.1-12.1)         | 1.03 (0.76-1.41) | 1.03 (0.71-1.50) | 5.0 (4.0-6.2)          | 1.02 (0.69-1.51)  | 1.03 (0.67-1.56)   |
| Ontario           | 12.8 (10.7-15.1)       | 1.37 (1.02-1.84) | 1.52 (1.06-2.16) | 6.3 (5.2-7.8)          | 1.32 (0.91-1.93)  | 1.67 (1.11-2.52)   |
| Manitoba          | 11.7 (9.1-14.8)        | 1.24 (0.87-1.76) | 1.19 (0.78-1.83) | 6.9 (5.4-8.7)          | 1.45 (0.97-2.17)  | 1.52 (0.97-2.37)   |
| Saskatchewan      | 9.3 (7.5-11.3)         | 0.96 (0.70-1.31) | 0.84 (0.57-1.24) | 4.4 (3.1-6.1)          | 0.89 (0.56-1.42)  | 0.78 (0.46-1.31)   |

|                                |                  |                  |                  |                 |                  |                  |
|--------------------------------|------------------|------------------|------------------|-----------------|------------------|------------------|
| Alberta                        | 10.2 (8.3-12.4)  | 1.06 (0.78-1.45) | 0.92 (0.62-1.35) | 6.4 (5.0-8.1)   | 1.34 (0.89-2.00) | 1.27 (0.81-2.01) |
| B.C.                           | 15.5 (12.7-18.7) | 1.72 (1.25-2.36) | 2.09 (1.41-3.10) | 10.9 (8.0-14.8) | 2.40 (1.51-3.83) | 3.10 (1.96-4.89) |
| N.L. Newfoundland and Labrador |                  |                  |                  |                 |                  |                  |
| P.E.I. Prince Edward Island    |                  |                  |                  |                 |                  |                  |
| N.B. New Brunswick             |                  |                  |                  |                 |                  |                  |
