# Supplementary material
Source: PubMed Central journal article supplement (PMC7428071)

**Appendix 4 (as supplied by the authors)**

Age-Adjusted Trends in the Prevalence of Past-Year Cannabis Consumption Among All Women of Reproductive Age (15-44 years) and Women Reporting a Pregnancy in the Past Five years, Canada, 2008-2012

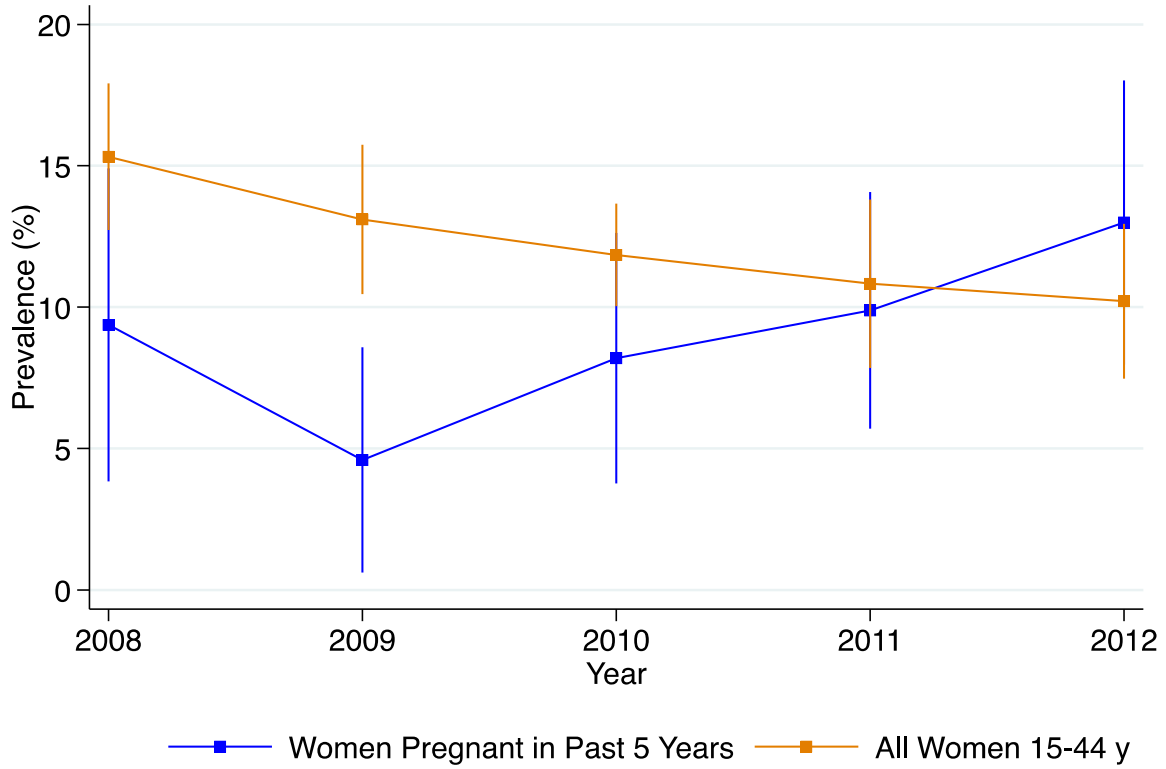

Supplement: supp_8.3.E487_2019-0229-4-at.pdf [file supp_8.3.E487_2019-0229-4-at.pdf]
